# Supplementary material
Source: PubMed Central journal article supplement (PMC7839980)
Supplement: NIHMS1641527-supplement-1.pdf [file NIHMS1641527-supplement-1.pdf]

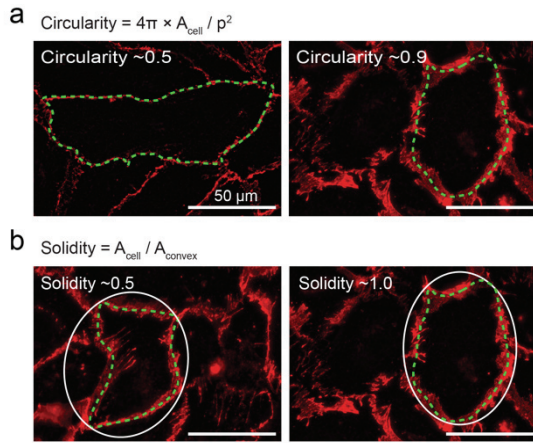

**Supplementary Fig. 1.** Cell shape factors. Equations and schematics represent how (a) circularity and (b) solidity are calculated. Cells are stained for VE-cadherin (red). Green dashes represent waypoints that trace the cell perimeter (p), showing the area of a cell ( $A_{cell}$ ). White circles represent the area of the cell convex ( $A_{convex}$ ). [All scale bars are 50 μm.](#)

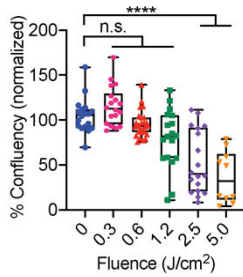

**Supplementary Fig. 2.** Low dose PDP does not impact cell confluency. HBMECs were incubated with BPD (0.25 μM) for 24 hours followed by light activation (690 nm, 0–5 J/cm<sup>2</sup>, 6 mW/cm<sup>2</sup>). The confluency of HBMECs was determined from Live/Dead<sup>®</sup> imaging at 24- post-PDP. The number of cells stained with Calcein AM (green channel) per frame was normalized to the control group. A One-Way ANOVA with multiple comparisons was used to calculate significant differences, where n.s. indicates not significant ( $p > 0.05$ ), \*  $p < 0.05$ , \*\*  $p < 0.01$ , \*\*\*  $p < 0.001$ , and \*\*\*\*  $p < 0.0001$ .  $N > 10$ , where N equals the number of images captured over 3 trials. Box plots show the mean and the likely range of variation. Error bars show the maximum and minimum values.

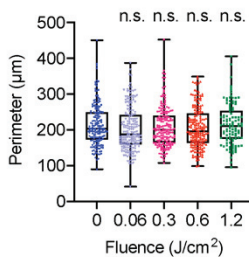

**Supplementary Fig. 3.** PDP does not alter cell perimeter. 90-minutes post priming (0–1.2 J/cm<sup>2</sup>, 6 mW/cm<sup>2</sup>), cells were fixed and stained for VE-cadherin and ZO-1. The cell perimeter was traced via ‘way pointing’ within the [Junction Analyzer Program](#). The Kruskal-Wallis test with a Dunn’s multiple comparison test was used to calculate significant differences, where

n.s. indicates not significant ( $p > 0.05$ ). The significance between the experiment group and the control is presented.  $N > 105$ , where N is the number of cells, from 3 different trials. Box plots show the mean and the likely range of variation. Error bars show the maximum and minimum values.

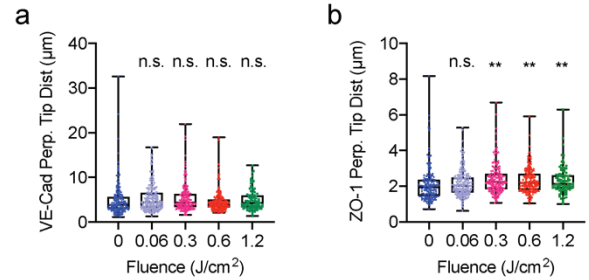

**Supplementary Fig. 4.** PDP did not alter the (a) protrusion length (i.e., tip-to-tip distance) of VE-cadherin perpendicular junctions, (b) but modulated the protrusion length of ZO-1 perpendicular junctions. At 90 minutes post-priming (0–1.2 J/cm<sup>2</sup>, 6 mW/cm<sup>2</sup>), cells were fixed and stained. The [Junction Analyzer Program](#) calculated the protrusion length of the perpendicular junctions after cells were way pointed. The Kruskal-Wallis test with a Dunn’s multiple comparison test was used to calculate significant differences, where n.s. indicates not significant ( $p > 0.05$ ). The significance between the experiment group and the control is presented.  $N > 105$ , where N is the number of cells, from 3 different trials. Box plots show the mean and the likely range of variation. Error bars show the maximum and minimum values.

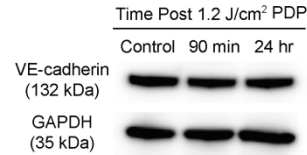

**Supplementary Fig. 5.** PDP does not alter total junction protein expression. HBMECs were grown to confluency, incubated with BPD (0.25 μM) for 24 hours, and primed (690 nm, 1.2 J/cm<sup>2</sup>, 6 mW/cm<sup>2</sup>). Representative immunoblotting of VE-cadherin confirms protein expression was unchanged at 90 minutes and 24 hours post-priming. GAPDH was used as the loading control.  $N=4$ , where N is the number of gels ran over 2 lysates.

**Supplementary Table 1.** Physical parameters of rhodamine-liposomes.

| Liposome Characteristics   |               |
|----------------------------|---------------|
| Hydrodynamic diameter (nm) | 104.08 ± 3.39 |
| Polydispersity Index (Pdl) | 0.06 ± 0.02   |
